# Supplementary figures and images for: Immunogenicity and Efficacy of Monovalent and Bivalent Formulations of a Virus-Like Particle Vaccine against SARS-CoV-2
Source: MDPI journal article supplement (doi:10.3390/vaccines10121997), 2022-11-24

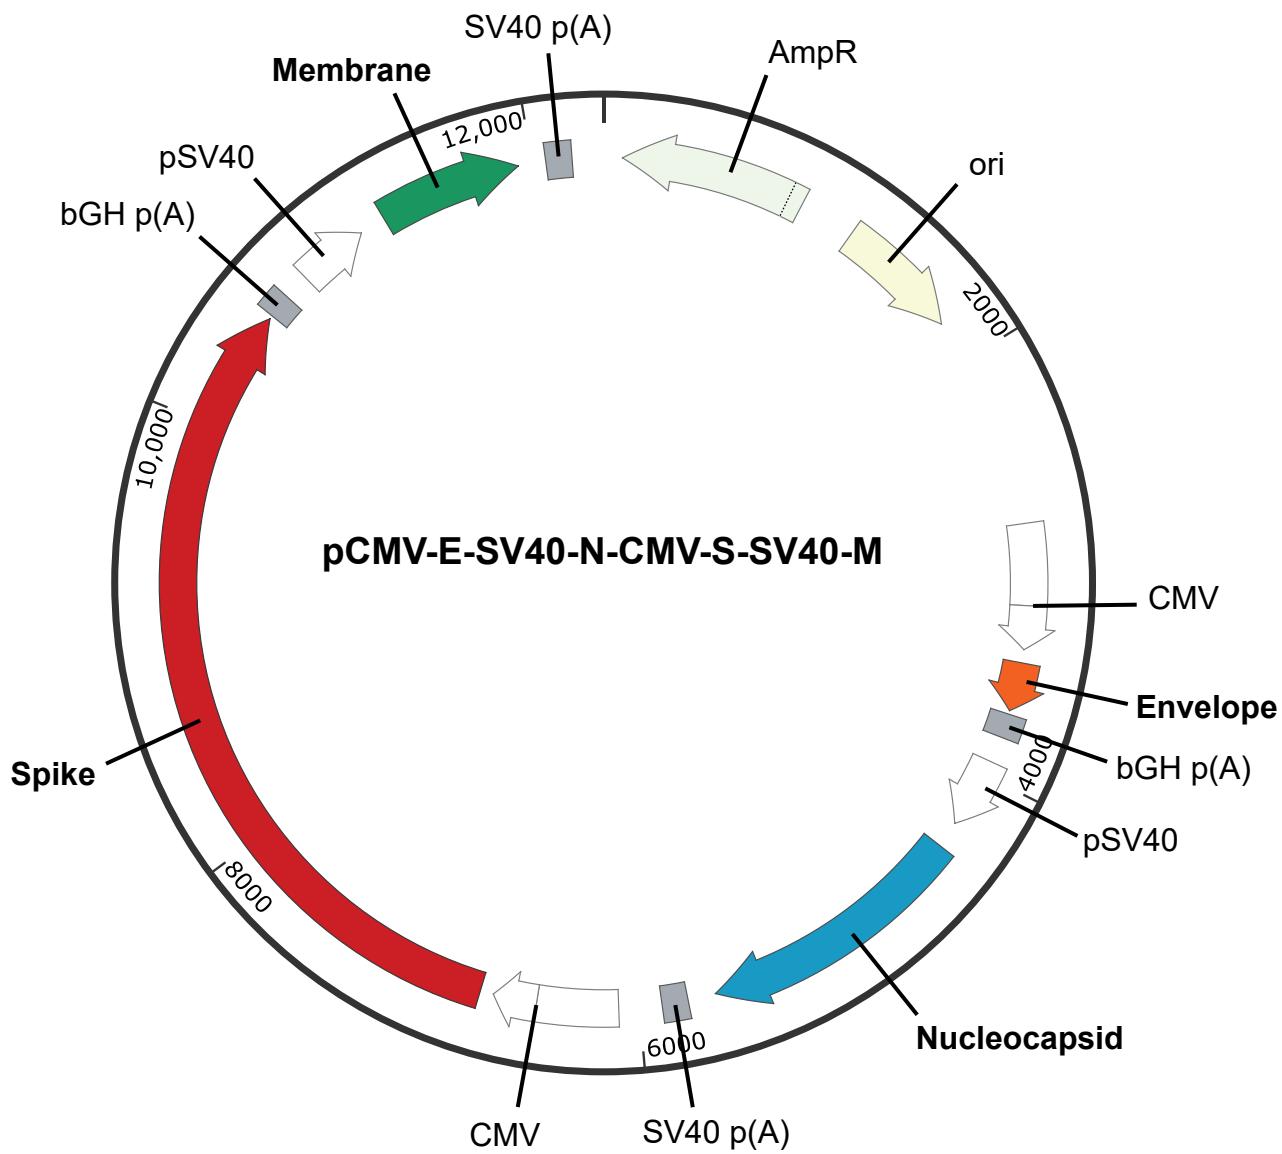

Supplement: s1 [file s1]

**a**

**Spike**

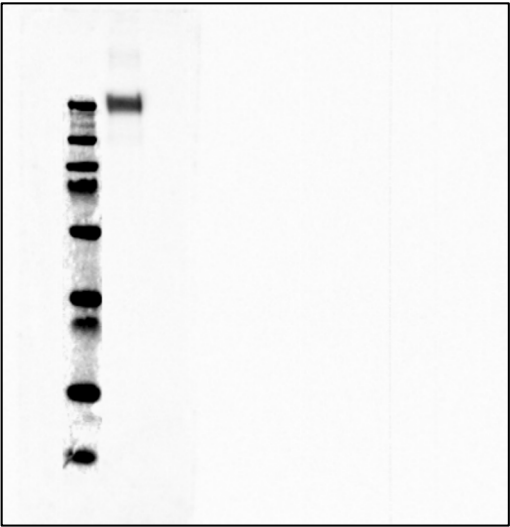

**b**

**Membrane**

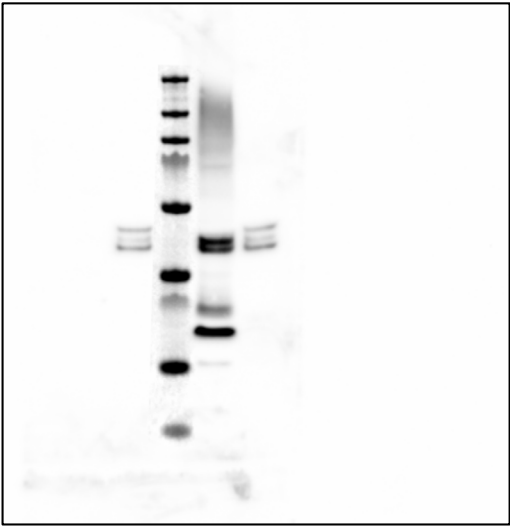

**c**

**Nucleocapsid**

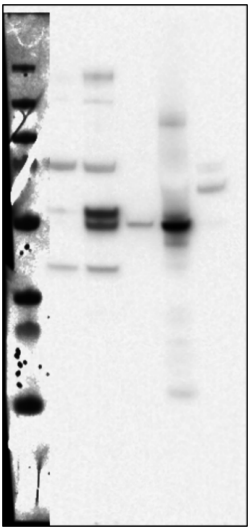

Supplement: s1 [file s1]
